# Supplementary material for: A low affinity cis-regulatory BMP response element restricts target gene activation to subsets of Drosophila neurons
Source: eLife. 2020 Oct 30;9:e59650. doi: 10.7554/eLife.59650 (PMC7669266; doi:10.7554/eLife.59650)
Supplement: Supplementary file 1. — (A) The full length Tv4-enhancer was isolated from Oregon R and the sequence is shown here. (B-D) We introduced substitution mutants into the full length Tv4-enhancer to generate three mutant enhancers that were tested in Figures 1 and 7. (E,F) The Homeodomain Response Element (HD-RE) and BMP-Response cis-Element (BMP-RCE) were identified previously within the Tv4-enhancer. The sequences shown in E, F are a 6× concatemer of the HD-RE (E) and 4× concatemer of the BMP-RCE (F) enhancers used to drive EYFP in the TvHD-RE-EYFP and TvBMP-RE-EYFP transgenes, respectively in Figure 2. Bolded black letters are the Mad and Medea binding sites of the BMP-LA. Bolded red letters are the substitution mutations introduced. Green letters are the Restriction enzyme sites or Restriction scar sites in the concatemeric sequences of E,F. (b) List of 128 BMP-LA motifs in the Drosophila genome with an average PhastCons score over 0.55. The BMP-LA motifs are ranked according to their average PhastCONS score. The location of each motif is indicated according to the August 2014 (BDGP Release 6 + ISO1 MT/dm6) Assembly. The first column indicates the assigned name for the BMP-LA as used throughout the manuscript or its location based on the nearest gene. Out of these 128 motifs, we found that 68% (87/128) is located within an intron or untranslated region (UTR), while the remaining 32% (41/128) are intergenic relative to the nearest gene. Blue BMP-LAs indicate those tested but not found to be BMP-dependent. Bolded red letters indicate the BMP-LA motifs in genomic fragments found to be BMP-dependent in third instar larva VNC. *Average evolutionary conservation score of a motif calculated based on the base-by-base conservation of each position in the motif. (c) Summary of BMP-LA containing genomic fragments tested for in vivo reporter activity. We prioritized 24 enhancers to test in vivo based on their proximity to genes expressed (4th column) in the third instar larvae VNC. Reporters were sorte [file elife-59650-supp1.xlsx]

## Sheet: Supplementary File 1a
	Descriptor	Sequence
A.	Wildtype Tv4-enhancer	CCATCTGCAGACGTGGTTTTCGAACGTATTTATATTGATTATGGGTGATCGTCAACAAGAGCAGTGGACACCCAATAAACCTGTTCAAAAACCCGACACATTTCTGCCCAGTCATGCGTGGTGGACAATAGCCAAATGCCATTGATGAGACTCGTCTCCCAAACTTTGGCCTTTTGCCGGGCCGTAATTACAGACTTCCGTCTTTTGAACAGTTTTTTCAGCCCCACCCAAGAGTCGAGTCTTGAAAAGCTGGCTGGGATGGGGTGGTTTCGGGTGCTGGACGAGGTGCCAGAGGCGCCACAATGTATCCCGTTACAGGTTACAGGGCCATAAAGCGCCATAAACGCCGCGACGGCAATGGCAAATTATAACGCATACGGACACGTAGTCGATCCACTG…
B.	B. Tv4mut5’BRE (Figure 1-figure supplement 1)	CCATCTGCAGACGTGGTTTTCGAACGTATTTATATTGATTATGGGTGATCGTCAACAAGAGCAGTGGACACCCAATAAACCTGTTCAAAAACCCGACACATTTCTGCCCAGTCATGCGTGGTGGACAATAGCCAAATGCCATTGATGAGACTCGTCTCCCAAACTTTGGCCTTTTGCCGGGCCGTAATTACAGACTTCCGTCTTTTGAACAGTTTTTTCAGCCCCACCCAAGAGTCGAGTCTTGAAAAGCTGGCTGGGATGGGGTGGTTTCGGGTGCTTTCATCTCGTAACTAGGCGCCACAATGTATCCCGTTACAGGTTACAGGGCCATAAAGCGCCATAAACGCCGCGACGGCAATGGCAAATTATAACGCATACGGACACGTAGTCGATCCACTG…
C.	Tv4GTAT>ACTA (Figure 5)	CCATCTGCAGACGTGGTTTTCGAACGTATTTATATTGATTATGGGTGATCGTCAACAAGAGCAGTGGACACCCAATAAACCTGTTCAAAAACCCGACACATTTCTGCCCAGTCATGCGTGGTGGACAATAGCCAAATGCCATTGATGAGACTCGTCTCCCAAACTTTGGCCTTTTGCCGGGCCGTAATTACAGACTTCCGTCTTTTGAACAGTTTTTTCAGCCCCACCCAAGAGTCGAGTCTTGAAAAGCTGGCTGGGATGGGGTGGTTTCGGGTGCTGGACGAGGTGCCAGAGGCGCCACAATACTACCCGTTACAGGTTACAGGGCCATAAAGCGCCATAAACGCCGCGACGGCAATGGCAAATTATAACGCATACGGACACGTAGTCGATCCACTG…
D.	Tv4GTAT>CAGC (Figure 5)	CCATCTGCAGACGTGGTTTTCGAACGTATTTATATTGATTATGGGTGATCGTCAACAAGAGCAGTGGACACCCAATAAACCTGTTCAAAAACCCGACACATTTCTGCCCAGTCATGCGTGGTGGACAATAGCCAAATGCCATTGATGAGACTCGTCTCCCAAACTTTGGCCTTTTGCCGGGCCGTAATTACAGACTTCCGTCTTTTGAACAGTTTTTTCAGCCCCACCCAAGAGTCGAGTCTTGAAAAGCTGGCTGGGATGGGGTGGTTTCGGGTGCTGGACGAGGTGCCAGAGGCGCCACAATGACGCCCGTTACAGGTTACAGGGCCATAAAGCGCCATAAACGCCGCGACGGCAATGGCAAATTATAACGCATACGGACACGTAGTCGATCCACTG…
E.	TvHD-RE (Figure 1-figure supplement 1)	TTGCCGGGCCGTAATTACAGACTTCGCTAGATTGCCGGGCCGTAATTACAGACTTCGCTAGATTGCCGGGCCGTAATTACAGACTTCGCTAGATTGCCGGGCCGTAATTACAGACTTCGCTAGATTGCCGGGCCGTAATTACAGACTTCGCTAGATTGCCGGGCCGTAATTACAGACTTCGCTAGA
F.	TvBMP-RCE (Figure 1-figure supplement 1)	GGACGAGATGCCAGAGGCGCCACAATGTATCCCGTTACAGCTAGAGGACGAGATGCCAGAGGCGCCACAATGTATCCCGTTACAGCTAGAGGACGAGATGCCAGAGGCGCCACAATGTATCCCGTTACAGCTAGAGGACGAGATGCCAGAGGCGCCACAATGTATCCCGTTACA

## Sheet: Supplementary File 1b
Name or Gene/Location	Chr	Motif Start	Motif Stop	Average PhastCONS
FMRFa	chr2R	9905662	9905676	1
CM20	chr3R	17053115	17053129	1
CM17	chr3R	28698786	28698800	1
CM9	chr3L	14589744	14589758	1
CM18	chr3R	9836926	9836940	1
CM2	chr2L	9319175	9319189	1
CM8	chr3R	15594263	15594277	1
CM3	chr2R	19199705	19199719	1
CM4	chr2L	11595431	11595445	1
CM6	chr3L	15776762	15776776	1
Rtnl1 intron 3	chr2L	4997220	4997234	1
Trim9 intron 8	chr2L	10625774	10625788	1
Pka-R2 intron 2	chr2R	10011600	10011614	1
bru3 intron 3	chr3L	13604317	13604331	1
twi intron 2	chr2R	22993220	22993234	1
tow intron 2	chr3L	6945724	6945738	1
dally intron 1	chr3L	8871078	8871092	1
tna intron 1	chr3L	10865636	10865650	1
olf413 intron 1	chr3L	22172305	22172319	1
TyrRII intron 4	chr3R	17742553	17742567	1
Eip93F intron 3	chr3R	21993235	21993249	1
Fur1 intron 3	chr3R	25407474	25407488	1
CG42594 intron 1	chrX	4858114	4858128	1
dpr8 intron 3	chrX	14403502	14403516	1
Frq2 intron 1	chrX	18189557	18189571	1
Poxm 5`UTR	chr3R	8333334	8333348	1
Dop1R1 3`UTR	chr3R	14177245	14177259	1
intergenic CG10814	chr2R	13381992	13382006	1
intergenic CG13197	chr2R	11698415	11698429	1
intergenic CG3483	chr2R	24447895	24447909	1
intergenic kek1	chr2L	12796326	12796340	1
intergenic CR44449	chr2R	8297798	8297812	1
intergenic CG33669	chrX	6401404	6401418	1
intergenic Lim1	chrX	8817329	8817343	1
intergenic Ten-a	chrX	12344815	12344829	1
CM19	chr3R	18357071	18357085	0.999929
CG43778 intron 1	chr2L	13318639	13318653	0.999929
CG43187 3`UTR	chr2R	16383772	16383786	0.999929
CR45381 intergenic	chr3L	22643174	22643188	0.999929
CG1677 intron 1	chrX	7384251	7384265	0.999929
His3.3B intron 1	chrX	9156120	9156134	0.999929
CM24	chr3R	18498566	18498580	0.999857
Arabido CDC48 intron 3	chr2R	10078209	10078223	0.999857
put intron 1	chr3R	14625155	14625169	0.999786
B-H1 3`UTR	chrX	17401928	17401942	0.999786
CM21	chr2R	24694131	24694145	0.999643
esn intron 1	chr2R	7098405	7098419	0.999571
intergenic CG14861	chr3R	15017832	15017846	0.999429
fas intron 1	chr2R	13624759	13624773	0.999357
ctp intron 2	chrX	4696943	4696957	0.999286
intergenic CR46206	chr2L	12769249	12769263	0.999214
bru3 intron 4	chr3L	13652625	13652639	0.999143
Dys intron 20	chr3R	19531223	19531237	0.999143
fz2 intron 3	chr3L	19195036	19195050	0.999071
Pde9 intron 4	chrX	12811496	12811510	0.998929
dpr8 intron 6	chrX	14428012	14428026	0.998929
Kdm4B intron 7	chr2R	13181632	13181646	0.998786
CM1	chrX	15616808	15616822	0.998643
sima intron 7	chr3R	30099041	30099055	0.998571
tai intron 2	chr2L	9183827	9183841	0.998429
DIP-theta intron 2	chr2L	5646986	5647000	0.998357
intergenic ttm3	chr2L	22078344	22078358	0.998143
SKIP intron 4	chr3R	22206280	22206294	0.997857
eys intron 1	chr2L	2317671	2317685	0.997786
CM12	chr2R	13835553	13835567	0.997357
CM13	chr3L	2836246	2836260	0.997214
CM22	chrX	1649111	1649125	0.997143
Sdc intron 2	chr2R	21439469	21439483	0.997071
CG44153 intron 1	chr2L	10101019	10101033	0.996071
slo intron 8	chr3R	24680334	24680348	0.996071
CG13577 intergenic	chr2R	24266317	24266331	0.995857
intergenic Tsp42Er	chr2R	7066733	7066747	0.995714
intergenic CG42581	chrX	20098187	20098201	0.994143
bru3 intron 2	chr3L	13594870	13594884	0.993857
stops intron 6	chr3R	31163405	31163419	0.9935
CR46251	chr3L	12807820	12807834	0.993357
intergenic CR44610	chr2L	7170701	7170715	0.992929
intergenic Or56a	chr2R	19776586	19776600	0.992714
intergenic CG6142	chr3R	26149877	26149891	0.991143
CG13954 intron 1	chr2R	9386790	9386804	0.989214
CM23	chr2L	15189633	15189647	0.988429
NPFR intron 2	chr3R	6190654	6190668	0.985714
intergenic Osi10	chr3R	6263630	6263644	0.979786
dpr1 intron 1	chr2R	20701999	20702013	0.974571
intergenic CG1421	chr2L	21902091	21902105	0.9715
CM15	chr3R	10449056	10449070	0.969214
shot intron 8	chr2R	13899555	13899569	0.9685
bbx/waw intron 2	chrX	21367618	21367632	0.967
intergenic babi	chr3L	1109827	1109841	0.964786
Lar intron 5	chr2L	19696813	19696827	0.962714
intergenic CG6836	chr3L	18968777	18968791	0.96
Axn intron 6	chr3R	30032613	30032627	0.959857
Imp intron 2	chrX	10802908	10802922	0.957286
CM10	chrX	14450410	14450424	0.957214
intergenic CG14317	chr3R	18074272	18074286	0.955286
CG8176 intron 1	chr3R	9520576	9520590	0.952714
intergenic CR46198	chr3L	5089499	5089513	0.949
dpr3 intron 1	chr2L	2100027	2100041	0.939071
Rbfox1 intron 2	chr3L	10543590	10543604	0.930214
CG17816 intron 1	chr3R	7886205	7886219	0.926429
CG34354 intron 2	chr3R	28157542	28157556	0.923571
CM16	chr2R	23517681	23517695	0.922
CG31140 intron 1	chr3R	23965098	23965112	0.921571
Epac intron 1	chr2R	6798202	6798216	0.886143
intergenic CG17560	chr2L	20267907	20267921	0.843
Pde8 intron 2	chr2R	23663087	23663101	0.839571
bru1 intron 1	chr2L	12246540	12246554	0.824643
wnd intron 2	chr3L	19630521	19630535	0.807214
Pde6 intron 2	chr3R	14549351	14549365	0.795286
rg intron 24	chrX	5244930	5244944	0.790357
CG43367 intron 16	chr3L	4212273	4212287	0.778571
Syt7 intron 7	chr4	281385	281399	0.771929
intergenic CG1142	chr3R	7477674	7477688	0.765286
CM5	chr3L	13570864	13570878	0.756857
intergenic CG2016	chr3R	4962832	4962846	0.732786
intergenic Or85b	chr3R	8502500	8502514	0.712357
CG2942 intron 2	chrX	2267732	2267746	0.712143
luna intron 2	chr2R	10991400	10991414	0.6965
Mob2 3`UTR	chr3L	11523467	11523481	0.691143
intergenic Fancm	chr3R	21482021	21482035	0.636214
Lar intron 6	chr2L	19675206	19675220	0.630357
Tehao intron 1	chr2L	13437095	13437109	0.619857
CM11	chr3L	11348427	11348441	0.6135
Gfr1 3`UTR	chr3R	20381142	20381156	0.613143
CM14	chrX	10180864	10180878	0.588214
intergenic phy1	chr2R	14427124	14427138	0.560071
CG32698 intron 2	chrX	9824969	9824983	0.559357
CM7	chrX	14696740	14696754	0.554643

## Sheet: Supplementary File 1c
DNA fragment	BMP-LA genomic coordinates (dm6 – BDGP Release 6 plus ISO1 MT)	Average PhastCons*	Nearby CNS expressed gene	Distance in bp (BMP-LA to nearby CNS-expressed gene TSS)	Position relative to nearest gene
CM21	chr2R:24694131-24694145	0.999643	ST6Gal	255	intronic
CM20	chr3R:17053115-17053129	1	Dad	878	intergenic
CM12	chr2R:13835553-13835567	0.997357	CG6357	4486	intergenic
CM16	chr2R:23517681-23517695	0.922	RabX1	5918	intergenic
CM9	chr3L:14589745-14589758	1	HGTX	9814	intronic
CM23	chr2L:15189633-15189647	0.988429	CG4168	10850	intronic
CM10	chrX:14450410-14450424	0.957214	dpr8	11990	intronic
CM1	chrX:15616808-15616822	0.998643	sog	13535	intronic
CM4	chr2L:11595432-11595445	1	kek2	13580	intronic
CM15	chr3R:10449056-10449070	0.969214	Cyp12e1	14252	intergenic
CM2	chr2L:9319175-9319189	1	Eaat1	14378	intergenic
CM11	chr3L:11348427-11348441	0.6135	CG6163	16516	intergenic
CM3	chr2R:19199705-19199719	1	Hppy	21070	intronic
CM14	chrX:10180864-10180878	0.588214	CG43902	22431	intronic
CM19	chr3R:18357071-18357085	0.999929	CG31235	28085	intergenic
CM18	chr3R:9836926-9836940	1	Teh1	31308	intronic
CM17	chr3R:28698786-28698800	1	htt	36100	intronic
CM7	chrX:14696740-14696754	0.554643	NetA	42813	intronic
CM13	chr3L:2836246-2836260	0.997214	Tet	43090	intronic
CM8	chr3R:15594263-15594277	1	AOX3	46528	intergenic
CM24	chr3R:18498566-18498580	0.999857	fru	47233	intronic
CM6	chr3L:15776762-15776776	1	Comm	48800	intergenic
CM22	chrX:1649111-1649125	0.997143	br	74545	intronic/3`UTR
CM5	chr3L:13570864-13570878	0.756857	bru-3	96083	intronic

## Sheet: CM# Primers sets
	Primer Sequence
	(5`→ 3`)
CM20	F: GGCTTTCAAGAGCTCAAAGGCCAGACA
	R: ATTACCGCGTTAGCCAACACTATTTCC
CM1	F: TTTCGCAAGTGCGTAGCATACGAAATAG
	R: CAGGGACAGAGCGAAGTGCCTTTGAAA
CM21	F: CAATGAAACCTGGCGGATGTGGCCCGC
	R: TCGCAATGAAGACGACATCCCCCACAC
CM17	F: GCGTGTAACGGCCAAATACTAAGCC
	R: CGACAAATAAGCGGAGACAAGCGGCC
CM22	F: CGAAATATCTCTTTGGTCTGGGCAAAT
	R: CGCAGGCAAAGAAAGCGGCCGCAGAG
CM8	F: TCTTTGGTCGGCTTAATTGCTGATCTA
	R: TCTTTGAGCCAAAATTCTAAATATGCC
CM7	F: GAGTTGTTATTGGTGAAGAAATTGTG
	R: GGGCAAAGCTGCGAATTTAAGGGTCCG
CM9	F: TGACTGAACAATCAGGACCAAAATG
	R: TGCCTCTTCCGCCATTTTTATGAGTT
CM18	F: CACCACCACCACACCTTAAAAACCGT
	R: GATTCTTTTGGGATCTTGTGCCTTAG
CM2	F: CGGAACGGGTATCAATCAATAGCCA
	R: GCATTTTCAATTTGGACCCGTCAGC
CM19	F: TTTGCTGTTATTGCTGTTATTGCTATCGC
	R: TTAATTGTTGTTTCCGAGTGCGCTCAAT
CM10	F: GTACTTTGACAGCTCACGCAAAGGTTG
	R: GATGCCAACAAATTGCCTCTGCGGCCGC
CM12	F: TTTTCCCCACTGTGCTCAGACGGAAAC
	R: CGAAATAAATTGCGATCTCTGCGGCCGC
CM3	F: GCTCAATTGTTTGGAAAATCCCAAGCAA
	R: GTCATTCAGTCAGGCGCTCTGCGGCCGC
CM23	F: TTCATCTTATATTCAACCAAATTGTGA
	R: GCAGCCCGCAAAACTCGGAAAAGC
CM11	F: GTTTCATCGTTCTGCTGTTTTAGCTGT
	R: CAATCCAGCAACCACCCTCTGCGGCCGC
CM4	F: GAGAAATTCCACTTCGGCAACATATTTG
	R: CCGCTTGTGTACATAACTCTGCGGCCGC
CM13	F: CCACCCATGAGTGTGCGTGCATGTGT
	R: TTAGGGGGAAAATAATATAAGACCAA
CM14	F: GCTATAGTCGAGAATATATGACCAATC
	R: ATAGCCACCAACACATTAGGCAATCGA
CM15	F: CTCCTCGATAAGCCGACGTTGGTAGGA
	R: ATAGCCACCAACACATTAGGCAATCGA
CM6	F: CAGACTAGAAAATCTCCCAGTGTGGGC
	R: TGTCAATAGTTCGTTTTGACAGGCTGA
CM16	F: CTATAAATGGGCCAAAAAGGCTGTTTTG
	R: CGAAATTGAATTGCATATGAGCTTTAGG
CM24	F: CACCGGCAGCCTACTCAGTGGCGTCAT
	R: AAATGCGCTGAATGTCATCACCCATCG
CM5	F: GCCGCGAGACTCATGAAATATTTATGC
	R: TTTGAGGGAGAATGAAACCCTTTGCTGC
